## RESEARCH ARTICLE

## Stress generation, relaxation and size control in confined tumor growth

Huaming Yan<sup>1</sup>, Daniel Ramirez-Guerrero<sup>1,2</sup>, John Lowengrub<sup>1,2,3,4\*</sup>, Min Wu<sup>5\*</sup>

**1** Department of Mathematics, University of California, Irvine, Irvine, California, United States of America, **2** Center for Multiscale Cell Fate Studies, University of California, Irvine, Irvine, California, United States of America, **3** Department Biomedical Engineering, University of California, Irvine, Irvine, California, United States of America, **4** Center for Complex Biological Systems, University of California, Irvine, Irvine, California, United States of America, **5** Department of Mathematical Sciences, Worcester Polytechnic Institute, Worcester, Massachusetts, United States of America

\* [lowengrb@math.uci.edu](mailto:lowengrb@math.uci.edu) (JL); [englier@gmail.com](mailto:englier@gmail.com) (MW)

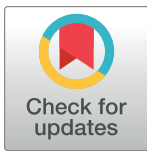

## OPEN ACCESS

**Citation:** Yan H, Ramirez-Guerrero D, Lowengrub J, Wu M (2021) Stress generation, relaxation and size control in confined tumor growth. PLoS Comput Biol 17(12): e1009701. <https://doi.org/10.1371/journal.pcbi.1009701>

**Editor:** Philip K Maini, Oxford, UNITED KINGDOM

**Received:** April 3, 2021

**Accepted:** November 29, 2021

**Published:** December 21, 2021

**Copyright:** © 2021 Yan et al. This is an open access article distributed under the terms of the [Creative Commons Attribution License](https://creativecommons.org/licenses/by/4.0/), which permits unrestricted use, distribution, and reproduction in any medium, provided the original author and source are credited.

**Data Availability Statement:** All written code and generated data in support of this publication are publicly available at <https://github.com/huamingyan/StressTumorGrowth>.

**Funding:** J.L., H.Y. and D.R-G. acknowledge partial funding from the National Science Foundation-Division of Mathematical Sciences (NSF-DMS) grants DMS-1714973 and DMS-1763272/Simons Foundation (594598, QN) for the Center for Multiscale Cell Fate Research at UC Irvine. M.W. acknowledge partial funding from NSF-DMS-2012330. J.L. additionally acknowledges partial funding from the National Institutes of Health (NIH)

## Abstract

Experiments on tumor spheroids have shown that compressive stress from their environment can reversibly decrease tumor expansion rates and final sizes. Stress release experiments show that nonuniform anisotropic elastic stresses can be distributed throughout. The elastic stresses are maintained by structural proteins and adhesive molecules, and can be actively relaxed by a variety of biophysical processes. In this paper, we present a new continuum model to investigate how the growth-induced elastic stresses and active stress relaxation, in conjunction with cell size control feedback machinery, regulate the cell density and stress distributions within growing tumors as well as the tumor sizes in the presence of external physical confinement and gradients of growth-promoting chemical fields. We introduce an adaptive reference map that relates the current position with the reference position but adapts to the current position in the Eulerian frame (lab coordinates) via relaxation. This type of stress relaxation is similar to but simpler than the classical Maxwell model of viscoelasticity in its formulation. By fitting the model to experimental data from two independent studies of tumor spheroid growth and their cell density distributions, treating the tumors as incompressible, neo-Hookean elastic materials, we find that the rates of stress relaxation of tumor tissues can be comparable to volumetric growth rates. Our study provides insight on how the biophysical properties of the tumor and host microenvironment, mechanical feedback control and diffusion-limited differential growth act in concert to regulate spatial patterns of stress and growth. When the tumor is stiffer than the host, our model predicts tumors are more able to change their size and mechanical state autonomously, which may help to explain why increased tumor stiffness is an established hallmark of malignant tumors.

## Author summary

The mechanical state of cells can modulate their growth and division dynamics via mechanotransduction, which affects both the cell size distribution and the tissue size as

grant 1U54CA217378- 01A1 for a National Center in Cancer Systems Biology at the UC Irvine (also provided support to H.Y.), and from NIH grant P30CA062203 for the Chao Family Comprehensive Cancer Center at UC Irvine. The funders had no role in study design, data collection and analysis, decision to publish, or preparation of the manuscript.

**Competing interests:** The authors have declared that no competing interests exist.

a whole. Experiments on tumor spheroids have shown that compressive stress from their environment can reversibly decrease tumor expansion rates and final sizes. Besides external confinement and compression on the tumor border, a heterogeneous stress field can be generated inside the tumor by nutrient-driven differential growth. Such growth-induced mechanical stresses can be relaxed by tissue rearrangement, which happens during cell neighbor exchanges, cell divisions, and extracellular matrix renewal. In this study, we have developed a continuum model that describes the above mechanical interactions and the dynamics of tissue rearrangement explicitly. Motivated by published experimental data, we consider mechanotransduction where the local compressive stress slows down cell growth and cell size reduction limits cell division. We have analyzed how external mechanical stimuli and internal processes influence the outcome of cell-and-tissue sizes and spatial patterns of cell density and mechanical stress in growing tumors.

## Introduction

The importance of mechanical forces in regulating cell behaviors during normal development and homeostasis [1, 2], and in disease progression such as cancer [3–5], is now widely recognized. In addition to driving cell movement and deformation, biophysical forces act via mechanotransduction to regulate cell fates, division, and death rates [6–9]. Nevertheless, the effects of tissue properties and mechanical stresses on cancer progression and treatment outcomes are still not well understood. *In vitro* experiments on avascular tumor spheroids have shown that changes in their mechanical environment can result in different tumor expansion rates, stress distributions, final sizes [10–13], and altered cell density fields [13]. Further, it was recently observed that the material properties of tissues and external mechanical compression may play distinct roles in tumor growth [14]. In addition to mechanical compression from the exterior environment, stresses within growing tumors can be generated by nutrient-driven differential growth of cells as well as active contractility of cells [15]. The release of these stresses, by cutting, slicing, or punch protocols [14, 16], can cause finite deformations at rates faster than those of a typical cell cycle and these deformations can be used to estimate the residual elastic stress. The elastic stresses are maintained by structural proteins and adhesive molecules [17], and can be actively relaxed due to processes such as turnover/reassembly of structural and adhesion molecules, cell re-arrangements, and oriented cell divisions [1] at timescales spanning from minutes to hours [17, 18].

In this paper, we present a new continuum model in the laboratory (Eulerian) frame. This approach facilitates the nonlinear coupling between finite-elastic stresses, which are traditionally described using material coordinates (Lagrangian frame), and reaction-diffusion equations that model tissue growth and the dynamics of cell substrates (e.g. oxygen and nutrients), which are traditionally described in the Eulerian frame. We fit the model to experimental data from two independent studies of tumor spheroid growth and perform parametric studies around the fitted parameter regime. We investigate how a tumor spheroid modulates its size as a whole, as well as cell density and stress distribution via internal stress relaxation in the context of external physical confinement and limited nutrient diffusion in conjunction with feedback machineries on cell growth [19–21] and division [22, 23].

## Methods

### Tissue elasticity in an Eulerian frame

We formulate the elastic stresses using Eulerian coordinates. Instead of relating the reference coordinate  $\mathbf{X}$  of a material point to its current coordinate  $\mathbf{x}$  at time  $t$  via a mapping  $\mathbf{x} = \chi(\mathbf{X}, t)$ , as is done in a Lagrangian frame, we instead relate the reference and current coordinates using a so-called reference map  $\mathbf{Y} := \chi^{-1}$ , which maps the current coordinate  $\mathbf{x}$  of a material point to its reference coordinate  $\mathbf{X} = \mathbf{Y}(\mathbf{x}, t)$ , e.g., [24, 25]. Assuming spherical symmetry (see [S1 Text](#) for a fully 3D formulation), we denote the reference map as  $y(r, t)$ , where  $y$  and  $r$  are the reference and current radial coordinates of a material point. Treating the tumor spheroid as an incompressible, neo-Hookean elastic material the nondimensional elastic stresses can be written as

$$\sigma_{rr} = \left(\frac{y}{r} / \frac{\partial y}{\partial r}\right)^{4/3}, \quad \sigma_{\theta\theta} = \left(\frac{\partial y}{\partial r} / \frac{y}{r}\right)^{2/3}, \quad \sigma_{\phi\phi} = \sigma_{\theta\theta}, \quad (1)$$

where we have nondimensionalized the stress using the shear modulus of the tumor tissue. This approach can also be used for more general constitutive laws [26]. The total stress (Cauchy stress tensor) is  $\sigma^{tot} = \sigma - p\mathbf{I}$  where  $p$  is the pressure. The tumor tissue is approximately incompressible in its elastic response since most of its volume fraction is water. However, volume loss can occur against compression due to water efflux [13], which we will introduce shortly. Further, time and space are nondimensionalized using the characteristic cell-cycle time scale of  $\tau = 1$  day and a length scale of  $l = 1\mu\text{m}$ . See [S1 Text](#) for the full, nonsymmetric, dimensional model and nondimensionalization.

### Adaptive reference map and stress relaxation

We describe the relaxation of the elastic stresses in [Eq \(1\)](#) by introducing the relaxation rate  $\beta$  that reflects how rapidly the reference coordinates adapt to the current coordinates:

$$\frac{\partial y}{\partial t} + v \cdot \frac{\partial y}{\partial r} = \beta(r - y) \quad (2)$$

where  $v$  is the cell velocity and  $y(r, 0) = r$ , assuming the initial state is unstressed. When  $\beta = 0$ ,  $y$  satisfies  $\partial_t y(r, t) + v(r, t) \partial_r y(r, t) = 0$ , which means the reference coordinate of a material point is unchanged along its trajectory [24, 25]. In the results, we will show a positive value of  $\beta$  (adaptation) is necessary to achieve mechanical equilibrium when the tumor reaches its equilibrium size. Notice the dynamics of the displacement field  $u = r - y$  becomes  $\partial_t u + v \cdot \frac{\partial u}{\partial r} = v - \beta u$ , which decays with a rate of  $\beta$ . This form of relaxation is one of the key assumptions of the paper, because it determines how the growing body reorganizes and the stress relaxes. Combining [Eqs \(1\) and \(2\)](#) yields a Maxwell-like viscoelastic stress relaxation. This is similar in spirit to the approach used in [27] to model viscoelasticity in the context of a model of the cell cytoskeleton. See [S1 Text](#) for more details. We note that other forms of stress relaxation could be used, including traditional viscoelasticity (e.g., [28, 29]), yield stress-triggered cell reorganization (e.g., [30]) or growth anisotropy (e.g., [31, 32]).

### Force balance inside the tumor

We model the tissue as an overdamped, incompressible, nonlinear elastic material so that at any point in the tissue the velocity is proportional to the force. Using radial symmetry, the

nondimensional system is:

$$\alpha v = -\frac{\partial p}{\partial r} + \frac{\partial \sigma_{rr}}{\partial r} + \frac{2}{r}(\sigma_{rr} - \sigma_{\theta\theta}), \tag{3}$$

where  $\alpha$  is the nondimensional friction (drag) coefficient and  $v$  is the radial velocity. We denote the total radial and circumferential stresses by  $\sigma_{rr}^{tot} = \sigma_{rr} - p$  and  $\sigma_{\theta\theta}^{tot} = \sigma_{\theta\theta} - p$ , respectively.

### External compression

At the spheroid boundary  $r = R$ , we have the force balance relation

$$\sigma_{rr}^{tot}(R, t) = \sigma_{rr}(R, t) - p(R, t) = -F_{ext}, \tag{4}$$

where  $-F_{ext}$  represents the result of external physical confinement from a surrounding solid material, such as externally applied hydrostatic pressure, or surface tension. Assuming that the spherical tissue grows within an incompressible neo-Hookean material, similar to the experimental set-up in [10], the external compression at the tumor boundary can be written as a function of the initial and current radius,  $R_0$  and  $R(t)$ , respectively (see Section 1.3 in S1 Text):

$$F_{ext} = \frac{c_H}{2} \left( 5 - \frac{R_0(R_0^3 + 4R(t)^3)}{R(t)^4} \right), \tag{5}$$

where  $c_H$  is the shear modulus of the surrounding material relative to that of the tumor tissue. Alternatively, if a hydrostatic pressure  $\bar{p}$  is applied, as in [12, 13], then  $F_{ext} = \bar{p}$ .

### Cell density

We assume the nondimensional local cell proliferation rate is given by  $\lambda_c^{net}(r, t) = \lambda_c(r, t)c - \lambda_{A,c}$ , where  $\lambda_c(r, t)$  is the rate of cell divisions,  $c$  is the concentration of a growth promoting biochemical factor that represents the net effect of diffusible substances (e.g., oxygen, glucose) on cell division, and  $\lambda_{A,c}$  is the rate of apoptosis. Henceforth, the growth promoting factor  $c$  is referred to as nutrient.

The cell number density  $\rho_c$  (cell numbers per unit volume) should follow

$$\frac{\partial \rho_c}{\partial t} + v \frac{\partial \rho_c}{\partial r} + \frac{\rho_c}{r^2} \frac{\partial(r^2 v)}{\partial r} = \rho_c(\lambda_c c - \lambda_{A,c}) + \frac{1}{r^2} \frac{\partial}{\partial r} \left( D \rho_c r^2 \frac{\partial \rho_c}{\partial r} \right) \tag{6}$$

where  $-D \rho_c \frac{\partial \rho_c}{\partial r}$  models the cell number flux due to local cell neighbor exchanges. This term can also be interpreted as a Darcy-type flow where  $D$  is the mobility and  $\frac{\partial \rho_c}{\partial r}$  is the potential gradient. When  $\lambda_c^{net}(r, t) = \lambda_c(r, t)c - \lambda_{A,c} = \frac{1}{r^2} \frac{\partial(r^2 v)}{\partial r}$ , we have  $\rho_c \equiv const.$  if the initial and boundary conditions admit  $\rho_c = const.$  as solutions. In general, the rates of cell division and apoptosis and the rates of cell volumetric growth and loss (introduced below) are not necessarily matched.

### Volumetric growth

We assume that the rate of local volume change is given by  $\lambda^{net}(r, t) = \lambda(r, t)c - \lambda_A(r, t)$ , where  $\lambda(r, t)$  is the rate of volume increase (e.g., cell volume growth) and  $\lambda_A(r, t) = \lambda_{A,c} + \lambda_E(r, t)$  is the rate of volume loss from cell apoptosis  $\lambda_{A,c}$  and the rate of water efflux  $\lambda_E(r, t)$ . Considering that the majority of its volume fraction is water, the tumor spheroid is incompressible such

that  $\lambda^{net}(r, t) = \frac{1}{r^2} \frac{\partial(r^2 v)}{\partial r}$ . Thus the radial velocity  $v(r, t)$  is:

$$v(r, t) = \frac{1}{r^2} \int_0^r (\lambda(\eta, t)c - \lambda_A(\eta, t))\eta^2 d\eta, \tag{7}$$

and the tumor radius evolves via  $dR(t)/dt = v(R, t)$ . As the tumor size changes,  $c$  can be modeled as

$$c(r, t) = (R(t) \sinh(\frac{r}{L})) / (r \sinh(\frac{R(t)}{L})), \tag{8}$$

assuming the substrate diffuses in from the tissue boundary, with  $c(R(t), t) = 1$ , and is uptaken at a constant rate by tumor cells. Here,  $L$  is the nondimensional diffusion length. Note that  $c(R(t), t)$  could be a function of time, but we assume here that there is sufficient supply from the microenvironment to maintain  $c(R(t), t)$  constant. See Section 1.3 in [S1 Text](#) for details.

### Water efflux and mechanotransduction

In growing tumor spheroids, compressive stresses can inhibit cell proliferation (e.g., [12, 13]) as well as inducing water efflux [13]. Thus, we assume that local compressive stress induces local cell water efflux (with rate  $\lambda_E$ ) and inhibits cell volume growth (with rate  $\lambda$ ). We model the effect of compression on water flux and cell volume growth by

$$\lambda_E(r, t) = \Delta_A \frac{\gamma_A \sigma^m \cdot 1_{\{\sigma < 0\}}}{1 + \gamma_A \sigma^m \cdot 1_{\{\sigma < 0\}}}, \tag{9}$$

and

$$\lambda(r, t) = \frac{\lambda_0}{1 + \gamma_\lambda \sigma^n \cdot 1_{\{\sigma < 0\}}}, \tag{10}$$

respectively, as Hill-type equations where  $\lambda_0$  is the base rate of cell volume growth,  $\sigma = (2\sigma_{\theta\theta}^{tot} + \sigma_{rr}^{tot})/3$  is the invariant measure of the local total stress,  $\gamma_A$  and  $\gamma_\lambda$  are feedback strengths,  $\Delta_A$  is the maximum rate of the water flux,  $m$  and  $n$  are positive even integers, and  $1_\chi$  denotes the characteristic function of the set  $\chi$ . [Eq \(9\)](#) takes into the account of Michaelis-Menten kinetics with a saturation effect when the local compressive stress becomes large in magnitude. The cell growth rate ([Eq \(10\)](#)) decreases from the baseline rate  $\lambda_0$  in response to the local compressive stress. We assume that circumferential stresses  $\sigma_{\theta\theta}^{tot}$  dominate the invariant stress measure  $\sigma$  because the  $\sigma_{\theta\theta}^{tot}$  represents stresses from two principal directions while radial stress  $\sigma_{rr}^{tot}$  accounts for only one. In the Results section, we validate this assumption (see *Inhibition of growth through external confinement*). Therefore, we use  $\sigma_{\theta\theta}^{tot}$  rather than  $\sigma$  in [Eqs \(9\) and \(10\)](#) hereafter. The water efflux process may require a detailed consideration of flux exchange with the tumor interstitial space. For example, it is possible that the interstitial pressure and its associated fluid flow can limit the water efflux process from cells. While a full poroelastic model (e.g., [33]) would describe the mass and momentum interactions between the solid and liquid phases in detail, we assume for simplicity that the solid and liquid volume fractions are constant (and hence porosity), which limits the coupling between the solid and liquid components. There may be flow in the interstitial fluid (which could be modeled by Darcy’s law) due to mass uptake and production from cell growth, apoptosis, and water efflux but we assume this flow is sufficiently small so as to limit its contribution to momentum balance in the solid (e.g., see also [34]). Extensions of our approach to full poroelastic models will be considered in the future.

Both feedbacks on  $\lambda$  and  $\lambda_E$  can result in increased cell density  $\rho_c$  via Eq (6). When cell density is high, which means the local size of cells is small, cell division can be inhibited by multiple mechanisms [22, 23]. We model this effect by

$$\lambda_c(r, t) = \frac{\lambda_0}{1 + \gamma_c |\rho_c - 1|^l \cdot 1_{\{\rho_c > 1\}}} \tag{11}$$

where  $\gamma_c$  is the feedback strength and  $l$  is the Hill-coefficient. We assume that the base rate of cell division is the same as the base rate of cell volume growth  $\lambda_0$ . That is, without compression, the rate of cell division and the rate of cell volume growth are matched.

## Results

### A tumor spheroid growing with stress relaxation

We first simulate numerically (see Section 1.3 in S1 Text for the algorithm and parameters), the unconfined (free) growth of an initially unstressed tumor spheroid ( $F_{ext} = 0$ ). As seen in Fig 1A the tumor radius increases over time and approaches a steady-state, which is independent of the initial size or initial stress state (Fig B in S1 Text). Because of diffusion-limited

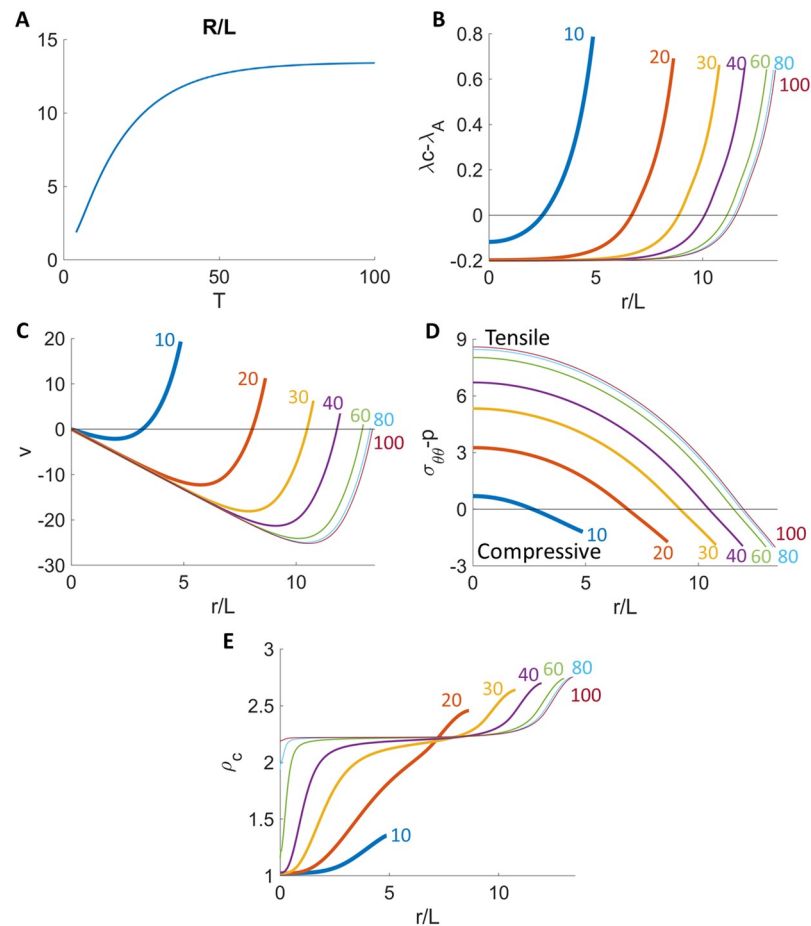

**Fig 1.** Time evolution of a freely growing tumor without external compression (A). The spatial distribution of net volumetric growth rate (B), cell velocity (C), circumferential stresses (D), and cell density (E) at different times. See S1 Text for the list of parameters.

<https://doi.org/10.1371/journal.pcbi.1009701.g001>



nutrient transport, the net volume rate of change  $\lambda^{net}(r, t) = \lambda(r, t)c(r, t) - \lambda_A(r, t)$  is spatially varying (Fig 1B). At early times when the tumor is small, the volume increases all throughout the tumor spheroid as nutrients are readily available. At later times, volume gain (due to cell growth) dominates at the spheroid boundary and volume loss (due to cell apoptosis and water efflux) dominates at the spheroid center (Fig 1B) where nutrient levels are low. Correspondingly, cells move outward at early times but at late times, as in previous models (e.g., [12, 32, 35]), cells divide at the boundary and move inward to compensate for the loss of volume at the center (Fig 1C), which may explain the presence of long-lasting apoptotic markers in the core of the tumor spheroids. The total circumferential stresses  $\sigma_{\theta\theta}^{tot}$  are compressive throughout the tumor spheroid at early times while at later times the stresses are compressive near the tumor edge and tensile in the center (Fig 1D). Further, the stresses equilibrate as soon as the tumor radius reaches equilibrium.

The spatial distribution of the circumferential stress at any given time  $t$  seems contradictory to the experimental and theoretical results in [34, 36], which found compressive stresses in the tumor interior and tensile stresses at the tumor boundary. In the experiments, these differences may be due to the specific tissue properties, external confinement of the implanted tumors and the growth stage of the implanted tumor. Note that in Fig 1, the tumor is freely growing and there is no external confinement. Differences between the theoretical results in [34, 36] and ours may be due to the different model assumptions of the stress-dependent volumetric growth and loss. Our results are consistent with stress patterns observed in implanted brain tumors in [14] except that we do not see tensile stresses near the tumor-host interface since our tumor is not confined. As we will see below, when the tumor grows in a confined region in our model, tensile stresses emerge at the tumor-host interface in the confining tissue and stresses in the tumor interior can be compressive or tensile depending on the tissue properties.

When the tumor reaches its equilibrium size  $R(t) = R_\infty$ , one can derive  $y_r(R_\infty) = \beta/(\beta + \lambda(R_\infty) - \lambda_A(R_\infty))$ . This shows that (i)  $\beta = 0$  (no relaxation) leads to a singularity in the elastic strain and (ii) increasing  $\beta$  restores the proportionality between  $y(r, t)$  and  $r$  and thus decreases the elastic energy (Fig C in S1 Text) and stress anisotropy (Fig D in S1 Text), which are both 0 when  $y(r, t) = r$ . Similar considerations hold at the tumor center. The cell density  $\rho_c(r, t)$  is highest in regions near the tumor boundary (Fig 1E). This is due to the synergistic effect among the rate of cell division  $\lambda_c^{net}(r, t) = \lambda_c(r, t)c - \lambda_{A,c}(r, t)$ , the rate of net local volume gain  $\lambda^{net}(r, t) = \lambda(r, t)c(r, t) - \lambda_A(r, t)$ , and the local flux of cells. One can see from Eq (6) that cell division tends to increase the cell density, while the local volume gain  $\lambda^{net}(r, t) = \frac{1}{r^2} \frac{\partial(r^2 v)}{\partial r} = \lambda(r, t)c(r, t) - \lambda_A(r, t)$  tends to decrease the cell density. When this two rates match, the cell density is uniform. However, when the compression near the tumor boundary slows down the local volume gain via mechanotransduction and water efflux, the local division rate becomes faster than that of the volume gain, which leads to an increase in cell number density. Notice the advection  $v \frac{\partial \rho_c}{\partial r}$  and local random neighbor exchange of cells  $\frac{1}{r^2} \frac{\partial}{\partial r} (D \rho_c r^2 \frac{\partial \rho_c}{\partial r})$  can further adjust the cell density distribution. In the central region with inward radial velocity  $v(r, t) < 0$ , local cell density increases due to the advection of the cells. At the tumor center with  $v(0, t) \equiv 0$ , the random neighbor exchange of cells  $\frac{1}{r^2} \frac{\partial}{\partial r} (D \rho_c r^2 \frac{\partial \rho_c}{\partial r})$  is necessary to describe local cell accumulation. This higher-order derivative term allows us to implement the no-flux boundary condition  $\frac{\partial \rho_c}{\partial r}(0, t) = 0$  at the tumor center, which facilitates changes in cell density at the tumor center according to the cell density in its neighborhood. Interestingly, we have found the value of  $D$  does not visibly affect the result in the cell density distribution (see Fig E in S1 Text). Nevertheless, the effect from the cell flux is secondary to the competition between

volume gain and cell proliferation rates (in this case), due to the high proliferative activity near the free tumor boundary.

### Inhibition of growth through external confinement

In [10], it was shown that the growth capacity of tumor spheroids (human colon adenocarcinoma, LS174T) in agarose gels decreases as the concentration of agarose is increased (Fig 2A and A in S2 Text); the stiffness of the gels is positively correlated with the agarose concentration. However, tumors suspended in gels with lower growth rates regain their free-growth capacity once the gels are removed (Fig 2E, symbols). We use our model to fit the experimental data from tumors grown in free suspension (0% gel) and 0.7% and 1.0% agarose gels using the same set of the tumor-associated parameters (which characterize the base rates and chemomechanical responses of LS174T) but different shear moduli of the gel (e.g.,  $c_H = 0$  for 0% and  $c_H > 0$  for the 0.7% and 1.0% gels). The experimental data consists of both tumor radius (shown as symbols in Fig 2A), and average cell densities of compressed tumors as a ratio to that of the free tumor (shown as vertical line segments denoting the mean and standard deviations of experimental measurements in Fig 2D). Since [10] suggests that cells does not adjust their rate of proliferation in response to the spatial confinement, we assume compressive stresses increase local water efflux ( $\gamma_A, \Delta_A > 0$  and  $\gamma_\lambda = 0$ ). Then, using the same tumor-associated parameters, we fit the other gel concentrations (Fig A in S2 Text) by changing only  $c_H$ . See S2 Text for details on the fitting process.

We find that the nondimensional relaxation rate  $\beta \sim 1$ , which suggests that a fully nonlinear elastic model is needed to describe tumor biomechanics, rather than a fluid model or a linear elastic model. Such reduced models arise as limits of our model where  $\beta \gg |\lambda^{net}|$ . See S1 Text for limiting cases in different parameter regimes. The results are presented in Fig 2 (and Fig A in S2 Text). There is good quantitative agreement between the model (curves) and

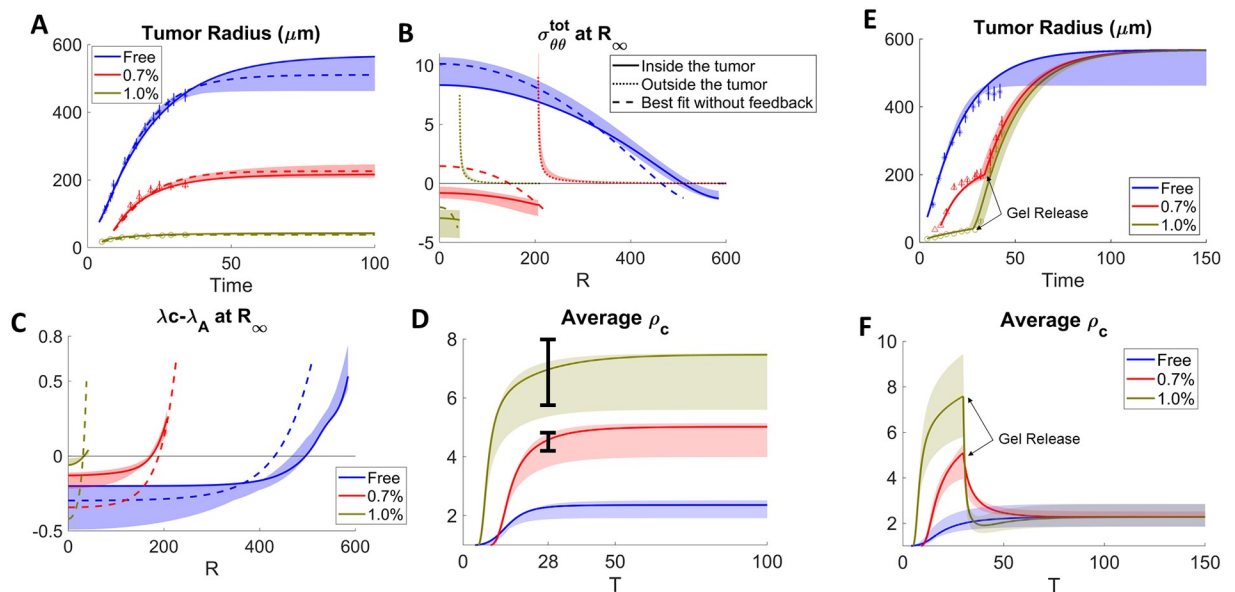

**Fig 2.** Fitting the model to data from [10] of tumor spheroids grown in free suspension (blue) and 0.7% (red) and 1.0% (brown) agarose gels with (solid) and without (dashed) feedback from the elastic stress (A) and when stresses are released by removing the gels in a narrow interval around the times reported in [10] (E). Bands show the results within 10% of the best fit with feedback in all panels. (B) and (C): The distributions of stresses and net volume growth rates from the model. (D) and (F): Average cell density of tumors in (A) and (E) respectively. The bars in (D) shows the experimental average density for 0.7% and 1.0% tumors, relative to the free tumor. See S2 Text for details.

<https://doi.org/10.1371/journal.pcbi.1009701.g002>



experiments (symbols) for the dynamics of the tumor spheroid radii (Fig 2A) where the bands show the results using parameters for which the results are within 10% of the best fit, which corresponds to  $\beta = 0.4$  and  $c_H^{1.0\%} = 1.8$  and  $c_H^{0.7\%} = 0.6$  (see S2 Text for all the fitted parameters). Fits to other gel concentrations are shown in Fig A in S2 Text. For the case of the 1.0% gel at equilibrium, we predict the circumferential stress ( $\sigma_{\theta\theta}^{tot}$ ) in the tumor at equilibrium is compressive and quasi-uniform (Fig 2C). We find that the average elastic energy in the tumor spheroid  $\frac{3}{4R_\infty^3} \int_0^{R_\infty} W(y, r, \frac{\partial y}{\partial r}) r^2 dr$  decreases even though  $c_H$  increases (Fig B in S2 Text), which shows that stress and stiffness are not always positively correlated. This result is consistent with the findings in [14]. Our results suggest that as  $c_H$  increases, the stresses in the tumor become mainly hydrostatic (see Fig B in S5 Text). When  $c_H \gg 1$ , it can be seen analytically that the leading-order stress distribution is uniform and is given by the compression at the boundary. As the agarose concentration of the gel is decreased,  $c_H$  decreases and the stresses are less compressive and less uniform (Fig 2B, solid curves). In the freely growing case, the stress becomes tensile in the tumor interior and is compressive only at the spheroid boundary similar to that observed in Fig 1D. In contrast, the stresses in the gel (dotted curves) are tensile, as the growth of the tumor stretches the surrounding gels circumferentially, with the maximum stress occurring at the spheroid boundary. This case is more like the situation in [36], where there is a periphery layer with slower growth than the intratumor region. Increasing the gel concentration, reduces the magnitude of the circumferential stresses outside the tumor because even though  $c_H$  increases, the smaller tumors displace the gel less. At equilibrium, there is a net volume loss in the tumor center, which is balanced by volume gain at the boundary (Fig 2C, solid curves). As seen in Figs 2 and A-D in S5 Text, the stress patterns in the tumor and surrounding gel depend on the tissue stiffnesses, the tumor growth rates and stress relaxation. Consistent with in vivo experimental results of orthotopically-implanted tumors in mice [14], the stresses in the tumor center can be compressive or tensile (depending on tissue properties) while tensile circumferential stresses occur at the slower-growing (e.g., gel) side of the tumor-host interface. Because of the discontinuity in growth and stress relaxation between the tumor and surrounding gel, the circumferential stresses are discontinuous at the tumor-host interface. If continuity were imposed, as might be expected in vivo, there should be a smooth transition of circumferential stress from compression to tension at the tumor-host interface.

To examine the effect of water efflux, we also fit the data without considering feedback from the elastic stress ( $\gamma_A = 0$ ). In this case, the predicted radii (dashed curves in Fig 2A) also provide a good fit of the data, but the stress distributions and net volume growth rates are more heterogeneous when considering growth regulated by nutrient level alone (Fig 2B and 2C, dashed). Further, using the corrected Akaike information criterion (AICc) [37] suggests the model with feedback provides a better fit to the experiment (see S2 Text). For the water-efflux feedback function (Eq (9)), we have considered the effect of the circumferential stress  $\sigma_{\theta\theta}^{tot}$ , reasoning that it dominates the mechanical state of the cells because it represents stresses from two principal directions orthogonal to the radial direction. One could change  $\sigma_{\theta\theta}^{tot}$  to the stress invariant  $(2\sigma_{\theta\theta}^{tot} + \sigma_{rr}^{tot})/3$  and obtain similar results. See S2 Text and Fig C in S2 Text.

We calculate the average cell density in the tumor by  $\frac{3}{4R_\infty^3} \int_0^{R_\infty} \rho_c(r, t) r^2 dr$  and plot this as a function of time. The average density increases with time. For more constrained tumors with increased gel stiffness, the average cell density increases, consistent with experimental data (vertical line segments in Fig 2D). Additionally, our simulation reveals that the region with largest cell density shifts towards the center of tumor (Fig 3A), indicating that tumor cells are most packed inside due to the inward cell flow. In this case, the effect of cell flux on the local

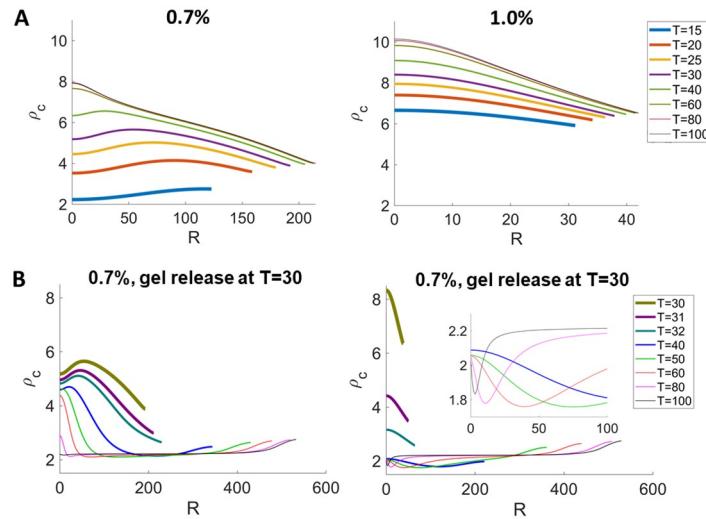

**Fig 3. Cell densities  $\rho_c$  in the constrained tumor in Fig 2.** (A) The regions with largest cell density shifts towards the tumor center, indicating cells are more packed inside the tumor. (B) After releasing the gel, the cell density recovers to the same level in the unconstrained tumor. See S3 Text for the list of parameters.

<https://doi.org/10.1371/journal.pcbi.1009701.g003>

cell density becomes primary, because volume growth and proliferative activities slow down due to globally elevated compression from the spatial confinement.

To model the gel-removal experiments from [10] (Fig 2E and 2F), we set  $c_H = 0$  in all the gel cases and use the common set of fitted tumor-associated parameters (see S2 Text for details). Again, there is good quantitative agreement between the numerics and experiments, which both tend to recover the growth of the unconstrained spheroid. The average cell density also recovers to the same level as in the free-boundary case. (Fig 2E and 2F) In addition, we also show that the spatial distribution of the cell density reverse to the distribution in the free-boundary case upon gel-removal, where the cell density near the tumor boundary becomes higher again (compare Figs 3B with 1E).

We also use the data from [12, 13], where colon carcinoma tumor spheroids containing mouse CT26 cell lines were grown under isotropic compression from an osmotically-induced external pressure. As suggested by [12, 13], the compressive stresses reduce proliferation rates without increasing apoptosis. Therefore, we fit our model with feedback on the proliferation rate to data in Figure 1 in [13]. In this case, the tumor radius is determined by the sensitivity to feedback from mechanical stresses ( $\gamma_s$ ) and pressure boundary condition ( $\bar{p}$ ), in addition to the volume loss rate  $\lambda_A$  and other parameters. We fit the experimental data in tumor radius (shown as symbols in Fig 4A) and data of relative cell density, where the density in the compressed tumor at tumor center is approximately 20% larger than that in the free tumor (see the triangle (mean) with error bars in Fig A in S4 Text). Our fitting yields good quantitative agreement between the model and experiments for the dynamics of the tumor spheroid radii (Fig 4A), as well as the cell density (Fig A in S4 Text). Similar to Fig 2B, the circumferential stress is also compressive at the tumor boundary, and becomes tensile towards the tumor center. Both the stress and the net volume growth are more uniform when feedback is considered. This can be seen by comparing the solid curve (with feedback) and dashed curve (without feedback) in Fig 4B and 4C.

Consistent to the trend in Fig 2D, the average cell density is higher in the more compressed tumor (Fig 4D). Again, external extra compression shifts the region with higher cell density

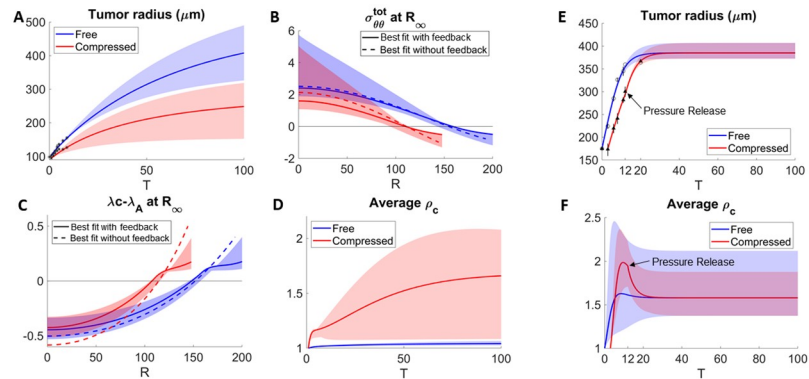

**Fig 4.** Fitting the model to data from [12, 13] of tumor spheroids grown free or with external pressure, with and without (dashed) feedback from the elastic stress (A). External pressure is released at the time reported in [13] (E). Bands show the results within 10% of the best fit with feedback in all panels. (B) and (C): The distributions of stresses and net volume growth rates from the model. (D) and (F): Average cell density of tumors in (A) and (E) respectively. See [S4 Text](#) for the list of parameters.

<https://doi.org/10.1371/journal.pcbi.1009701.g004>

towards tumor center, as can be seen in Fig A in [S4 Text](#). The tumor radius, the average cell density, as well as the cell density distribution are all reversible upon the pressure removal ([Fig 4E and 4F](#) and [Fig A](#) in [S4 Text](#)).

### Tumor size, stress and density patterns at equilibrium

Next, we perform a parametric study to investigate how the internal stress relaxation and external spatial confinement influence the sizes of tumor spheroids, their stress distributions and anisotropies. At equilibrium, tumor sizes decrease with  $c_H$  and increase with  $\beta$  due to external loading and internal relaxation, respectively ([Fig 5A](#)). The white dashed curve marks the boundary between tumor spheroids with tensile (to the left) and compressive (to the right) stresses at the spheroid center. When both  $c_H$  and  $\beta$  increase, the stress is less elastic and more hydrostatic ([Fig 5B](#), spatial distributions in [Figs A and B](#) in [S5 Text](#)) and less anisotropic ([Fig 5C](#), spatial distributions in [Figs C and D](#) in [S5 Text](#)). In addition, the stress distributions along the tumor radii ([Fig 5D](#)) become more uniform and less sensitive to changes in  $\beta$  when  $c_H$  increases, since the stress are dominated by compression from the external loading. When  $\beta$  and  $c_H$  lie within the region marked by the dashed red curve in [Fig 5A](#), the tumors are small but their stress distributions can be heterogeneous ([Fig 5D](#)). Interestingly, the corresponding dynamics of the spheroid radii are non-monotone as the stress equilibrates slowly towards the steady-state ([Fig E](#) in [S5 Text](#)); we have not seen this in published data, however. Following [38], we anticipate this could lead to a break in radial symmetry.

We also investigate how the stress relaxation and external spatial confinement affects the magnitude and spatial distribution of cell density. At equilibrium, the average cell density increases with external confinement, but decreases with stress relaxation ([Fig 5E](#)). As the external confinement becomes stronger, cells are more packed near the tumor center ([Fig 5F](#)).

### Discussion

We considered the influence of mechanical stress on rates of tumor tissue volume changes via the net effect between cell cycle in which the cell increases in size and the water efflux in which the cell decreases in size. The cell cycle can respond to the mechanical stresses via the shutting the transcriptional coactivators YAP and TAZ between the cytoplasm and the nucleus. The translocation of YAP and TAZ proteins is known to respond to multiple inputs,

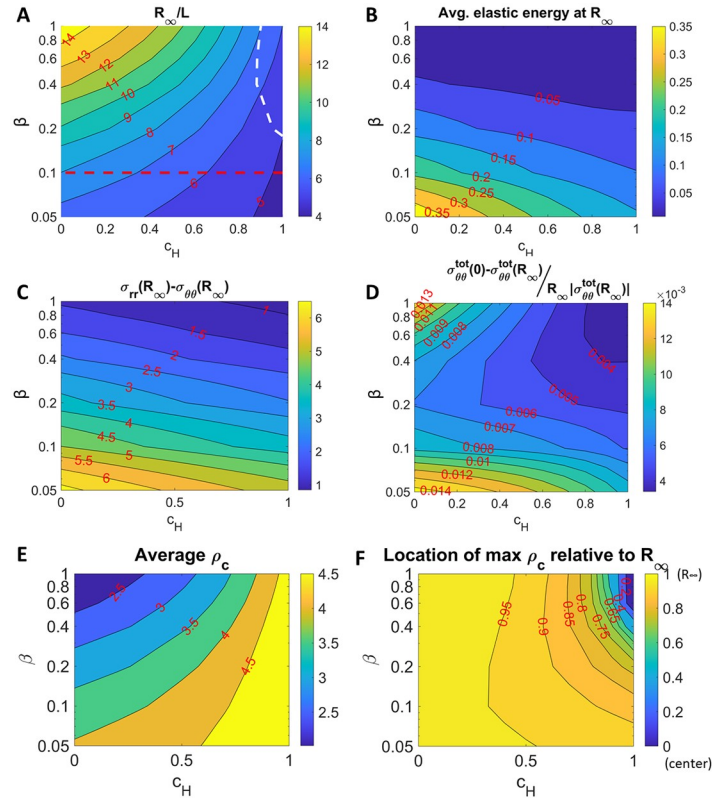

**Fig 5. Contour plot of steady-state tumor radius (A), average elastic energy in the tumor at steady-state (B), stress anisotropy at tumor boundary (C), averaged stress gradient in the tumor, (D), steady-state average density (E), and location of maximum  $\rho_c$  relative to tumor boundary (F) as a function of  $\beta$  and  $c_H$ .** The dashed white line shows the  $\sigma_{\theta\theta}^{tot}(0) = 0$  contour. The dashed red line shows the region where the dynamics of the radius are non-monotone (see Fig A in S5 Text). In (F), a value of 1 corresponds to the tumor boundary, while a value of 0 corresponds to the tumor center. See the main text for more details.

<https://doi.org/10.1371/journal.pcbi.1009701.g005>

including the Hippo signaling pathway [39]. The water efflux has been suggested by [13] as the explanation of the tumor spheroid shrinkage in response to external compression. By considering both effects, we found good agreement with experimental data from [10, 12, 13] where the volumetric growth rates of tumor spheroids adjust as the level of external confinement [10] or hydrostatic compression [12, 13] (presented in S4 Text) varies.

The stress patterns we find are also consistent qualitatively with in vivo experimental results of orthotopically-implanted tumors in mice [14], where depending on the tissue properties, the stresses in the tumor center can be compressive or tensile and are surrounded by a region of compressive stress with tensile circumferential stresses appearing at the tumor-host interface. However, in our model, the circumferential stresses are discontinuous at the tumor-host interface because we have assumed that the growth and stress relaxation are discontinuous at the tumor-gel interface. In vivo, where the tumor is surrounded by tissue and the tumor-host interface consists of narrow region containing a mixture of tumor and host cells, we would expect these growth and relaxation processes to be continuous, which would lead to smooth but rapid transitions of circumferential stress from compression to tension at the tumor-host interface as observed in vivo.

We have also modeled the spatiotemporal dynamics of the cell density– the number of cells per volume– in the growing tumor where the local cell density is increased by the cell division rate, decreased (diluted) by the local volume growth, and further adjusted by the local cell flux

to due advection or random neighbor exchanges. To prevent division of very small cells, we further consider that the division rate is decreased by local increases in cell density. Multiple feedback machineries such as contact inhibition [22] and cell cycle checkpoints [23] may be responsible for this negative feedback loop. By fitting the cell density data from [10, 13] simultaneously with the data of the volumetric growth rates, we found not only that the average cell density increases with the strength of external compression or confinement, but also that the location with the maximal cell density transits from the tumor boundary to the center.

To model the spatial temporal dynamics of the stresses in the tumor tissue, we have developed and applied a new model of stress relaxation using an Eulerian framework. At the macroscopic tissue level, we have coupled the rate of growth with diffusion-limited nutrient transport, which results in differential accumulated growth. This is different from previous works that prescribe the differential accumulated growth as spatial varying functions [38, 40] and is facilitated by the full Eulerian framework. To relax the stress, we have introduced a relaxation rate  $\beta$  and the resulting system is similar to but simpler than the classical Maxwell model of viscoelasticity. The cytoskeletal and intercellular junction remodeling should affect  $\beta$ . For example, faster turnover/reassembly of these structural and adhesion molecules should increase  $\beta$ . By fitting spheroid data from these two independent studies using different tumor cell lines, we find the relaxation rate  $\beta \sim 1$  per day, which is comparable to the volumetric growth rate of the tumor. Although we have not explicitly modeled the extracellular matrix in the growing tumor, we note that the dynamics of matrix and cell-matrix interactions should also impact the stress accumulation and relaxation. This is left to the future work. Our model predicts that feedback from elastic stresses result in a more uniform spatial pattern of growth rates, which is analogous to the spatial patterning of cell proliferation observed during development of the *Drosophila* wing disc [19–21] where feedback from elastic stresses was also found to be important for this pattern of growth. We found that when the compression from external confinement is non-negligible compared to the internal compression generated by differential growth, the tumor spheroid sizes and the stress distributions are not sensitive to changes in the material properties of the spheroids. Further, the total stress is nearly uniform and is dominated by hydrostatic pressure.

We can also gain insight on tumor growth *in vivo*. When a tumor increases its instantaneous elasticity relative to the external confinement (e.g., decreasing  $c_H$ ), such tumors are more able to change their size and mechanical state autonomously. This may explain why increased tumor stiffness is an established hallmark in tumor malignancy [18, 41]. On one hand, when  $c_H$  is small, the tumor size as well as the average cell size (the inverse of cell density) can be increased by increasing the stress relaxation rate  $\beta$ . On the other hand when  $\beta$  is small, the tumors have large elastic energy and anisotropy and the model predicts that the dynamics of the tumor can be non-monotone, although we have not seen this observed in published data. However, we anticipate that such tumors may be subject to morphological instability, increasing local invasiveness. In summary, we suggest that when the tumor stiffness dominates over the surrounding compressive stresses, then active relaxation—an effect from lumping the turnover and deposition of intracellular cytoskeleton structures, intercellular adhesion complexes, and extracellular matrices—can be used to leverage against local invasiveness and bulk expansion during tumor progression.

## Conclusion

We have developed biomechanical model that accounts for the stress generation and relaxation in the growing tumor spheroid, and have considered the chemomechanical responses of tumor tissue in regulating the size distribution of cells and the integrated size of the tissue. By fitting the model to experimental data from two independent studies of tumor spheroid

growth and their cell density distributions, treating the tumors as incompressible, neo-Hookean elastic materials, we find that the rates of stress relaxation of tumor tissues can be comparable to volumetric growth rates. Our study provides insight on how the biophysical properties of the tumor and host microenvironment, mechanical feedback control and diffusion-limited differential growth act in concert to regulate spatial patterns of stress and growth. In particular, when the tumor is stiffer than the host, our model predicts tumors are more able to change their size and mechanical state autonomously, which may help to explain why increased tumor stiffness is an established hallmark of malignant tumors.

## Supporting information

**S1 Text. Supplemental data for Fig 1.** Growth-induced deformation in an Eulerian frame, non-dimensionalization, radially symmetric case, numerical methods, parameters and supporting figures for Fig 1.

(PDF)

**S2 Text. Supplemental data for Fig 2.** Grid-search parameter optimization, parameters and supporting figures for Fig 2.

(PDF)

**S3 Text. Supplemental data for Fig 3.** Parameters for Fig 3.

(PDF)

**S4 Text. Supplemental data for Fig 4.** Grid-search parameter optimization, parameters and supporting figures for Fig 4.

(PDF)

**S5 Text. Supplemental data for Fig 5.** Parameters and supporting figures for Fig 5.

(PDF)

## Author Contributions

**Conceptualization:** Huaming Yan, John Lowengrub, Min Wu.

**Data curation:** Huaming Yan.

**Formal analysis:** Huaming Yan, Daniel Ramirez-Guerrero, John Lowengrub, Min Wu.

**Funding acquisition:** John Lowengrub, Min Wu.

**Investigation:** Huaming Yan, John Lowengrub, Min Wu.

**Methodology:** Huaming Yan, John Lowengrub, Min Wu.

**Project administration:** John Lowengrub, Min Wu.

**Resources:** John Lowengrub, Min Wu.

**Software:** Huaming Yan, Daniel Ramirez-Guerrero, John Lowengrub, Min Wu.

**Supervision:** John Lowengrub, Min Wu.

**Validation:** Huaming Yan, John Lowengrub, Min Wu.

**Visualization:** Huaming Yan, John Lowengrub, Min Wu.

**Writing – original draft:** Huaming Yan, John Lowengrub, Min Wu.

**Writing – review & editing:** Huaming Yan, John Lowengrub, Min Wu.



## References

1. LeGoff L, Lecuit T. Mechanical forces and growth in animal tissues. *Cold Spring Harb Perspect Biol.* 2016; 8:a019232. <https://doi.org/10.1101/cshperspect.a019232>
2. Julicher F, Eaton S. Emergence of tissue shape changes from collective cell behaviors. *Sem Cell Dev Biol.* 2017; 67:103–112. <https://doi.org/10.1016/j.semcdb.2017.04.004>
3. Jain RK, Martin JD, Stylianopoulos T. The role of mechanical forces in tumor growth and therapy. *Annu Rev Biomed Eng.* 2014; 16:321–346. <https://doi.org/10.1146/annurev-bioeng-071813-105259> PMID: 25014786
4. Kim HY, Jackson TR, Davidson LA. On the role of mechanics driving mesenchymal-to-epithelial transitions. *Sem Cell Dev Biol.* 2017; 67:113–122. <https://doi.org/10.1016/j.semcdb.2016.05.011> PMID: 27208723
5. Northcott JM, Dean IS, Mouw JK, Weaver VM. Feeling stress: The mechanics of cancer progression and aggression. *Frontiers in Cell and Dev Biol.* 2018; 6:17. <https://doi.org/10.3389/fcell.2018.00017> PMID: 29541636
6. Hsieh MH, Nguyen HT. Molecular mechanism of apoptosis induced by mechanical forces. *International review of cytology.* 2005; 245:45–90. [https://doi.org/10.1016/S0074-7696\(05\)45003-2](https://doi.org/10.1016/S0074-7696(05)45003-2) PMID: 16125545
7. Clause KC, Liu LJ, Tobita K. Directed stem cell differentiation: the role of physical forces. *Cell communication & adhesion.* 2010; 17(2):48–54. <https://doi.org/10.3109/15419061.2010.492535> PMID: 20560867
8. Kumar A, Placone JK, Engler AJ. Understanding the extracellular forces that determine cell fate and maintenance. *Development.* 2017; 144:4261–4270. <https://doi.org/10.1242/dev.158469> PMID: 29183939
9. Schwartz L, da Veiga Moreira J, Jolicoeur M. Physical forces modulate cell differentiation and proliferation processes. *Journal of cellular and molecular medicine.* 2018; 22(2):738–745. <https://doi.org/10.1111/jcmm.13417> PMID: 29193856
10. Helmlinger G, Netti PA, Lichtenbeld HC, Melder RJ, Jain RK. Solid stress inhibits the growth of multicellular tumor spheroids. *Nature biotechnology.* 1997; 15(8):778. <https://doi.org/10.1038/nbt0897-778> PMID: 9255794
11. Cheng G, Tse J, Jain RK, Munn LL. Micro-environmental mechanical stress controls tumor spheroid size and morphology by suppressing proliferation and inducing apoptosis in cancer cells. *PLoS one.* 2009; 4(2):e4632. <https://doi.org/10.1371/journal.pone.0004632> PMID: 19247489
12. Montel F, Delarue M, Elgeti J, Malaquin L, Basan M, Risler T, et al. Stress clamp experiments on multicellular tumor spheroids. *Physical review letters.* 2011; 107(18):188102. <https://doi.org/10.1103/PhysRevLett.107.188102> PMID: 22107677
13. Delarue M, Montel F, Vignjevic D, Prost J, Joanny JF, Cappello G. Compressive stress inhibits proliferation in tumor spheroids through a volume limitation. *Biophysical journal.* 2014; 107(8):1821–1828. <https://doi.org/10.1016/j.bpj.2014.08.031> PMID: 25418163
14. Nia HT, Seano G, Datta M, Jones D, Rahbari N, Incio J, et al. Solid stress and elastic energy as measures of tumour mechanopathology. *Nature biomedical engineering.* 2016; 1:0004. <https://doi.org/10.1038/s41551-016-0004> PMID: 28966873
15. Lee W, Kalashnikov N, Mok S, Haloui R, Kuzmin E, Putnam AJ, et al. Dispersible hydrogel force sensors reveal patterns of solid mechanical stress in multicellular spheroid cultures. *Nature Comm.* 2019; 10:144. <https://doi.org/10.1038/s41467-018-07967-4> PMID: 30635553
16. Nia HT, Datta M, Seano G, Huang P, Munn LL, Jain RK. Quantifying solid stress and elastic energy from excised or in situ tumors. *Nature protocols.* 2018; 13(5):1091. <https://doi.org/10.1038/nprot.2018.020> PMID: 29674756
17. Doubrovinski K, Swan M, Polyakov O, Wieschaus EF. Measurement of cortical elasticity in *Drosophila melanogaster* embryos using ferrofluids. *Proceedings of the National Academy of Sciences.* 2017; 114(5):1051–1056. <https://doi.org/10.1073/pnas.1616659114> PMID: 28096360
18. Cox TR, Erler JT. Remodeling and homeostasis of the extracellular matrix: implications for fibrotic diseases and cancer. *Disease models & mechanisms.* 2011; p. dmm-004077. <https://doi.org/10.1242/dmm.004077> PMID: 21324931
19. Shraiman BI. Mechanical feedback as a possible regulator of tissue growth. *Proceedings of the National Academy of Sciences.* 2005; 102(9):3318–3323. <https://doi.org/10.1073/pnas.0404782102> PMID: 15728365
20. Pan Y, Heemskerk I, Ibar C, Shraiman BI, Irvine KD. Differential growth triggers mechanical feedback that elevates Hippo signaling. *Proceedings of the National Academy of Sciences.* 2016; 113(45):E6974–E6983. <https://doi.org/10.1073/pnas.1615012113> PMID: 27791172

21. Irvine KD, Shraiman BI. Mechanical control of growth: ideas, facts and challenges. *Development*. 2017; 144(23):4238–4248. <https://doi.org/10.1242/dev.151902> PMID: 29183937
22. Kim NG, Koh E, Chen X, Gumbiner BM. E-cadherin mediates contact inhibition of proliferation through Hippo signaling-pathway components. *Proceedings of the National Academy of Sciences*. 2011; 108(29):11930–11935. <https://doi.org/10.1073/pnas.1103345108> PMID: 21730131
23. Barnum KJ, O'Connell MJ. Cell cycle regulation by checkpoints. In: *Cell Cycle Control*. Springer; 2014. p. 29–40.
24. Cottet HG, Maitre E, Milcent T. Eulerian formulation and level set methods for incompressible fluid-structure interaction. *ESAIM*. 2008; 42(3):471–492. <https://doi.org/10.1051/m2an:2008013>
25. Kamrin K, Rycroft CH, Nave JC. Reference map technique for finite-strain elasticity and fluid-solid interaction. *J Mech Phys Sol*. 2012; 60(11):1952–1969. <https://doi.org/10.1016/j.jmps.2012.06.003>
26. Fung YC. *Motion, Flow, Stress and Growth*. Springer-Verlag; 1990.
27. Copos CA, Guy RD. A porous viscoelastic model for the cell cytoskeleton. *ANZIAM J*. 2018; 59:472–498. <https://doi.org/10.1017/S1446181118000081>
28. Lubkin S, Jackson T. Multiphase mechanics of capsule formation in tumors. *Journal of biomechanical engineering*. 2002; 124(2):237–243. <https://doi.org/10.1115/1.1427925> PMID: 12002134
29. Bresch D, Colin T, Grenier E, Ribba B, Saut O. A viscoelastic model for avascular tumor growth. *Am Inst Math Sci Conf Pub 2009 (Special)*. 2009; p. 101–108. <https://doi.org/10.3934/proc.2009.2009.101>
30. Preziosi L, Ambrosi D, Verdier C. An elasto-visco-plastic model of cell aggregates. *Journal of Theoretical Biology*. 2010; 262(1):35–47. <https://doi.org/10.1016/j.jtbi.2009.08.023> PMID: 19712685
31. Araujo RP, McElwain D. A linear-elastic model of anisotropic tumour growth. *European Journal of Applied Mathematics*. 2004; 15(3):365–384. <https://doi.org/10.1017/S0956792504005406>
32. Araujo RP, McElwain DS. A mixture theory for the genesis of residual stresses in growing tissues II: solutions to the biphasic equations for a multicell spheroid. *SIAM Journal on Applied Mathematics*. 2005; 66(2):447–467. <https://doi.org/10.1137/040607125>
33. Roose T, Netti PA, Munn LL, Boucher Y, Jain RK. Solid stress generated by spheroid growth estimated using a linear poroelasticity model. *Microvascular research*. 2003; 66:204–212. [https://doi.org/10.1016/S0026-2862\(03\)00057-8](https://doi.org/10.1016/S0026-2862(03)00057-8) PMID: 14609526
34. Ambrosi D, Pezzuto S, Riccobelli D, Stylianopoulos T, Ciarletta P. Solid tumors are poroelastic solids with a chemo-mechanical feedback on growth. *Journal of Elasticity*. 2017; 129(1):107–124. <https://doi.org/10.1007/s10659-016-9619-9> PMID: 28894347
35. Jones A, Byrne H, Gibson J, Dold J. A mathematical model of the stress induced during avascular tumour growth. *Journal of mathematical biology*. 2000; 40(6):473–499. <https://doi.org/10.1007/s002850000033> PMID: 10945645
36. Stylianopoulos T, Martin JD, Chauhan VP, Jain SR, Diop-Frimpong B, Bardeesy N, et al. Causes, consequences, and remedies for growth-induced solid stress in murine and human tumors. *Proceedings of the National Academy of Sciences*. 2012; 109(38):15101–15108. <https://doi.org/10.1073/pnas.1213353109> PMID: 22932871
37. Burnham KP, Anderson DR. *Model Selection and Multimodel Inference: A practical information-theoretic approach* (2nd ed). Springer-Verlag; 2002.
38. Goriely A, Amar MB. Differential growth and instability in elastic shells. *Physical review letters*. 2005; 94(19):198103. <https://doi.org/10.1103/PhysRevLett.94.198103> PMID: 16090217
39. Pocaterra A, Romani P, Dupont S. YAP/TAZ functions and their regulation at a glance. *Journal of cell science*. 2020; 133(2). <https://doi.org/10.1242/jcs.230425> PMID: 31996398
40. Amar MB, Goriely A. Growth and instability in elastic tissues. *Journal of the Mechanics and Physics of Solids*. 2005; 53(10):2284–2319. <https://doi.org/10.1016/j.jmps.2005.04.008>
41. Lu P, Weaver VM, Werb Z. The extracellular matrix: a dynamic niche in cancer progression. *J Cell Biol*. 2012; 196(4):395–406. <https://doi.org/10.1083/jcb.201102147> PMID: 22351925
